# Supplementary material for: Effect of Maternal Diet and Milk Lipid Composition on the Infant Gut and Maternal Milk Microbiomes
Source: PubMed Central journal article supplement (PMC7551594; doi:10.3390/nu12092539), 2020-08-21
Supplement: nutrients-12-02539-s001.pdf [file nutrients-12-02539-s001.pdf]

| Supplemental Table 1: Clinical characteristics of the study participate |             |                           |                                   |                |            |                                  |                                           |        |                                    |                |                             |          |
|-------------------------------------------------------------------------|-------------|---------------------------|-----------------------------------|----------------|------------|----------------------------------|-------------------------------------------|--------|------------------------------------|----------------|-----------------------------|----------|
|                                                                         | Maternal    |                           |                                   |                |            |                                  |                                           | Infant |                                    |                |                             |          |
| Participant number                                                      | Age (years) | BMI (kg/cm <sup>2</sup> ) | Weight gain during pregnancy (kg) | Smoking habits | Blood type | Additive omega 3 consumption     | Maternal antibiotic treatment             | Sex    | Birth weight (kg) (WHO percentile) | Abdominal pain | Infant antibiotic treatment | Siblings |
| 1                                                                       | 37          | 27                        | 9                                 | no             | A+         | no                               | no                                        | male   | 3 (23%)                            | yes            | no                          | yes      |
| 2                                                                       | 35          | 20                        | 17                                | no             | B+         | no                               | no                                        | female | 3.4 (64%)                          | yes            | no                          | yes      |
| 3                                                                       | 32          | 23                        | 15                                | yes            | AB+        | no                               | yes (Synthomyicine)                       | male   | 3.4 (53%)                          | no             | no                          | yes      |
| 4                                                                       | 25          | 24                        | 16                                | no             | A+         | no                               | no                                        | female | 3.3 (57%)                          | no             | no                          | yes      |
| 5                                                                       | 33          | 22                        | 13                                | no             | A+         | no                               | no                                        | female | 3.1 (42%)                          | no             | no                          | yes      |
| 6                                                                       | 38          | 23                        | 15                                | no             | B+         | no                               | no                                        | male   | 3.7 (78%)                          | yes            | no                          | yes      |
| 7                                                                       | 29          | 20                        | 17                                | no             | A+         | yes                              | yes, during the labor (penicillin)        | female | 3.2 (51%)                          | yes            | no                          | no       |
| 8                                                                       | 36          | 20                        | 10                                | no             | O+         | no                               | no                                        | female | 2.9 (20%)                          | yes            | no                          | yes      |
| 9                                                                       | 31          | 21                        | 7                                 | no             | O+         | no                               | no                                        | female | 3.3 (57%)                          | yes            | no                          | yes      |
| 10                                                                      | 33          | 20                        | 14                                | no data        | O+         | yes                              | no                                        | female | 3.3 (53%)                          | yes            | no                          | yes      |
| 11                                                                      | 35          | 30                        | no data                           | no             | A+         | no                               | no                                        | female | 3.2 (47%)                          | yes            | no                          | yes      |
| 13                                                                      | 39          | 21                        | 9                                 | no             | A+         | yes                              | no                                        | male   | 3.4 (54%)                          | yes            | no                          | yes      |
| 14                                                                      | 34          | 22                        | 8                                 | no             | AB+        | no                               | no                                        | female | 3.0 (33%)                          | yes            | no                          | yes      |
| 15                                                                      | 30          | 22                        | 18                                | no             | B+         | no                               | no                                        | female | 3.7 (82%)                          | yes            | no                          | yes      |
| 17                                                                      | 27          | 20                        | 9                                 | no             | A+         | no                               | no                                        | male   | 3.1 (29%)                          | yes            | no                          | yes      |
| 18                                                                      | 32          | 19                        | 12                                | no             | A+         | no                               | no                                        | female | 3.2 (49%)                          | yes            | no                          | yes      |
| 19                                                                      | 29          | 21                        | 13                                | no             | B+         | yes (during 1 month after labor) | no                                        | male   | 3.4 (58%)                          | no             | no                          | no       |
| 20                                                                      | 34          | 37                        | 9                                 | no data        | B+         | no                               | yes (moxivite forte 3 months after labor) | female | 3.2 (44%)                          | yes            | no                          | yes      |
| 21                                                                      | 32          | 26                        | no data                           | no             | AB+        | no                               | no                                        | female | 2.4 (3%)                           | yes            | no                          | yes      |
| 22                                                                      | 37          | 19                        | 14                                | no             | O-         | no                               | no                                        | male   | 3.2 (39%)                          | yes            | no                          | yes      |
| 23                                                                      | 40          | 32                        | no data                           | no data        | A+         | no data                          | no data                                   | male   | 3.8 (83%)                          | yes            | no                          | yes      |
| 24                                                                      | 29          | 24                        | 15                                | no             | O+         | yes                              | yes, during the labor (penicillin)        | female | 3.5 (74%)                          | yes            | no                          | no       |

# Supplemental Figure 1: Chemical transesterification using acid

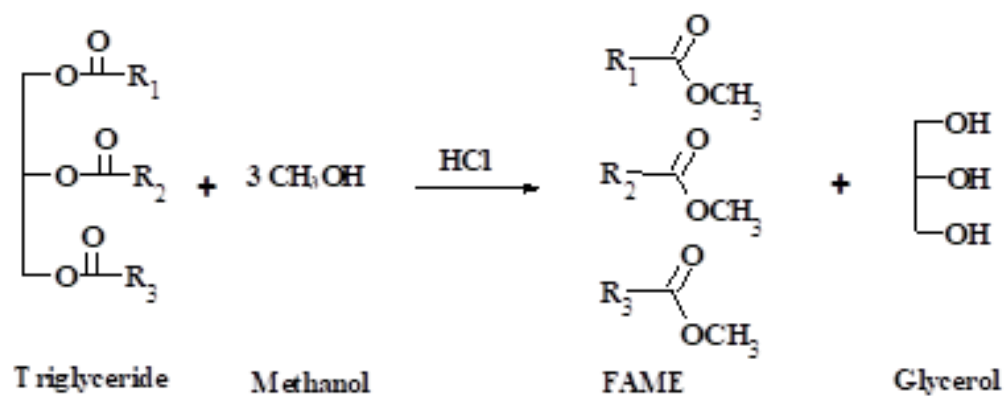

## Supplemental Figure 2: Comparison between infant gut microbiome and human milk microbiome

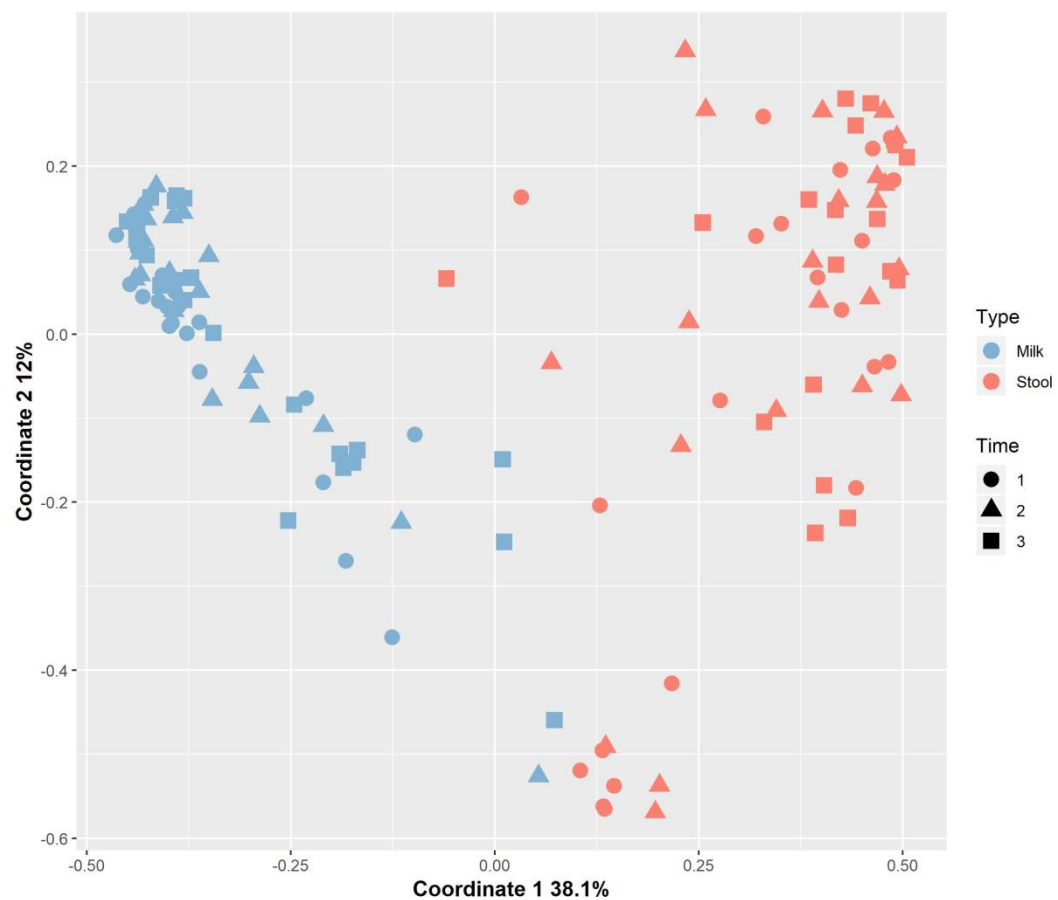

Supplemental Figure 3: inter and intra- subject comparisons between infant's stool bacterial composition in weighted unifracs distance diagrams

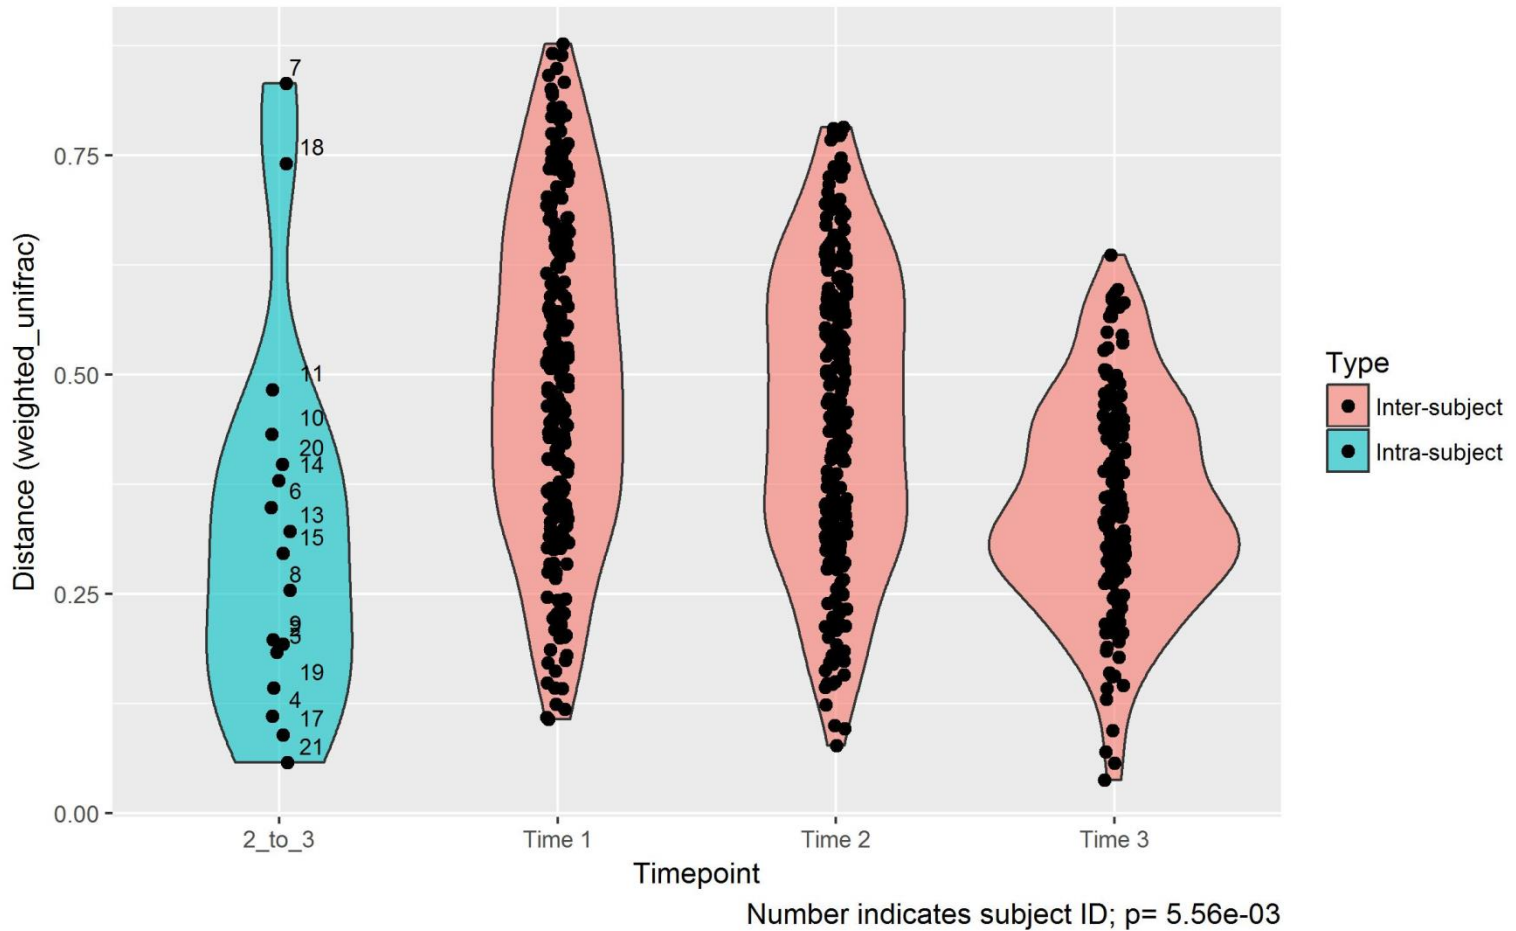

**Supplemental Table 2:** Interactions between human milk bacteria and FFQ nutrition components\*

| OTUs' repeats out of all the samples (%) | q     | p     | rho | ffq    | Taxonomic name                    | OTUs                                       |         |
|------------------------------------------|-------|-------|-----|--------|-----------------------------------|--------------------------------------------|---------|
| 99%                                      |       | 0     | 0   | -0.698 | Fatty_acids_total_monounsaturated | g_Streptococcus; s_Unknown <sup>1</sup>    | OTU_30  |
| 100%                                     |       | 0     | 0   | -0.706 | Fatty_acids_total_polyunsaturated | g_Streptococcus ; s_Unknown <sup>1</sup>   | OTU_13  |
| 99%                                      |       | 0     | 0   | -0.714 | Fatty_acids_total_polyunsaturated | g_Streptococcus; s_Unknown <sup>1</sup>    | OTU_33  |
| 100%                                     |       | 0     | 0   | -0.721 | Fatty_acids_total_polyunsaturated | g_Streptococcus; s_Unknown <sup>1</sup>    | OTU_23  |
| 99%                                      |       | 0     | 0   | -0.723 | Fatty_acids_total_polyunsaturated | g_Streptococcus; s_Unknown <sup>1</sup>    | OTU_24  |
| 99%                                      |       | 0     | 0   | -0.725 | Fatty_acids_total_polyunsaturated | g_Streptococcus; s_Unknown <sup>1</sup>    | OTU_15  |
| 97%                                      |       | 0     | 0   | -0.726 | Fatty_acids_total_polyunsaturated | g_Streptococcus; s_Unknown <sup>1</sup>    | OTU_37  |
| 99%                                      |       | 0     | 0   | -0.726 | Fatty_acids_total_polyunsaturated | g_Streptococcus; s_Unknown <sup>1</sup>    | OTU_62  |
| 100%                                     |       | 0     | 0   | -0.739 | Fatty_acids_total_polyunsaturated | g_Streptococcus; s_Unknown <sup>1</sup>    | OTU_1   |
| 91%                                      |       | 0     | 0   | -0.746 | Fatty_acids_total_polyunsaturated | g_Streptococcus; s_Unknown <sup>1</sup>    | OTU_571 |
| 99%                                      |       | 0     | 0   | -0.75  | Fatty_acids_total_polyunsaturated | g_Streptococcus; s_Unknown <sup>1</sup>    | OTU_30  |
| 91%                                      | 0.034 | 0.001 |     | -0.65  | Fatty_acids_total_polyunsaturated | g_Streptococcus; s_Unknown <sup>1</sup>    | OTU_670 |
| 100%                                     | 0.034 | 0.001 |     | -0.652 | Fatty_acids_total_monounsaturated | g_Streptococcus; s_Unknown <sup>1</sup>    | OTU_23  |
| 99%                                      | 0.034 | 0.001 |     | -0.653 | Folic_acid                        | g_Streptococcus; s_Unknown <sup>1</sup>    | OTU_33  |
| 91%                                      | 0.034 | 0.001 |     | -0.656 | Fatty_acids_total_polyunsaturated | g_Streptococcus; s_Unknown <sup>1</sup>    | OTU_328 |
| 90%                                      | 0.034 | 0.001 |     | -0.658 | Total_lipid_fat                   | g_Streptococcus; s_Unknown <sup>1</sup>    | OTU_291 |
| 99%                                      | 0.034 | 0.001 |     | -0.66  | Fatty_acids_total_monounsaturated | g_Streptococcus; s_Unknown <sup>1</sup>    | OTU_15  |
| 99%                                      | 0.034 | 0.001 |     | -0.667 | Total_lipid_fat                   | g_Streptococcus; s_Unknown <sup>1</sup>    | OTU_30  |
| 99%                                      | 0.034 | 0.001 |     | -0.671 | Fatty_acids_total_monounsaturated | g_Streptococcus; s_Unknown <sup>1</sup>    | OTU_24  |
| 97%                                      | 0.034 | 0.001 |     | -0.672 | Fatty_acids_total_polyunsaturated | g_Streptococcus; s_Unknown <sup>1</sup>    | OTU_131 |
| 91%                                      | 0.034 | 0.001 |     | -0.675 | Fatty_acids_total_monounsaturated | g_Streptococcus; s_Unknown <sup>1</sup>    | OTU_571 |
| 90%                                      | 0.034 | 0.001 |     | -0.679 | Fatty_acids_total_polyunsaturated | g_Streptococcus; s_Unknown <sup>1</sup>    | OTU_533 |
| 90%                                      | 0.034 | 0.001 |     | -0.685 | Fatty_acids_total_polyunsaturated | g_Streptococcus; s_Unknown <sup>1</sup>    | OTU_291 |
| 100%                                     | 0.034 | 0.001 |     | -0.688 | Fatty_acids_total_monounsaturated | g_Streptococcus; s_Unknown <sup>1</sup>    | OTU_1   |
| 90%                                      | 0.034 | 0.001 |     | -0.689 | Fatty_acids_total_monounsaturated | g_Streptococcus; s_Unknown <sup>1</sup>    | OTU_291 |
| 91%                                      | 0.048 | 0.003 |     | -0.61  | Carbohydrate_by_difference        | g_Streptococcus; s_Unknown <sup>1</sup>    | OTU_328 |
| 99%                                      | 0.048 | 0.003 |     | -0.61  | Total_lipid_fat                   | g_Streptococcus; s_Unknown <sup>1</sup>    | OTU_62  |
| 91%                                      | 0.048 | 0.003 |     | -0.611 | Carbohydrate_by_difference        | g_Streptococcus; s_Unknown <sup>1</sup>    | OTU_670 |
| 97%                                      | 0.048 | 0.003 |     | -0.612 | Fatty_acids_total_monounsaturated | g_Streptococcus; s_Unknown <sup>1</sup>    | OTU_131 |
| 100%                                     | 0.048 | 0.003 |     | -0.612 | Total_lipid_fat                   | g_Streptococcus; s_Unknown <sup>1</sup>    | OTU_23  |
| 91%                                      | 0.048 | 0.003 |     | -0.613 | Fatty_acids_total_monounsaturated | g_Streptococcus; s_Unknown <sup>1</sup>    | OTU_670 |
| 74%                                      | 0.048 | 0.003 |     | -0.613 | Folic_acid                        | f_Gemellaceae; g_ ; s_Unknown <sup>2</sup> | OTU_132 |
| 99%                                      | 0.048 | 0.003 |     | -0.614 | Folic_acid                        | g_Streptococcus; s_Unknown <sup>1</sup>    | OTU_30  |
| 99%                                      | 0.048 | 0.003 |     | -0.614 | Folic_acid                        | g_Streptococcus; s_Unknown <sup>1</sup>    | OTU_62  |
| 90%                                      | 0.048 | 0.003 |     | -0.617 | Energy                            | g_Streptococcus; s_Unknown <sup>1</sup>    | OTU_291 |
| 100%                                     | 0.048 | 0.003 |     | -0.618 | Folic_acid                        | g_Streptococcus; s_Unknown <sup>1</sup>    | OTU_1   |
| 90%                                      | 0.048 | 0.003 |     | -0.619 | Fatty_acids_total_polyunsaturated | g_Streptococcus; s_Unknown <sup>1</sup>    | OTU_455 |
| 99%                                      | 0.048 | 0.003 |     | -0.621 | Carbohydrate_by_difference        | g_Streptococcus; s_Unknown <sup>1</sup>    | OTU_30  |
| 91%                                      | 0.048 | 0.003 |     | -0.622 | Fatty_acids_total_polyunsaturated | g_Streptococcus; s_Unknown <sup>1</sup>    | OTU_261 |
| 99%                                      | 0.048 | 0.003 |     | -0.622 | Total_lipid_fat                   | g_Streptococcus; s_Unknown <sup>1</sup>    | OTU_15  |
| 99%                                      | 0.048 | 0.003 |     | -0.623 | Folic_acid                        | g_Streptococcus; s_Unknown <sup>1</sup>    | OTU_15  |
| 91%                                      | 0.048 | 0.002 |     | -0.625 | Carbohydrate_by_difference        | g_Streptococcus; s_Unknown <sup>1</sup>    | OTU_571 |
| 99%                                      | 0.048 | 0.002 |     | -0.627 | Fatty_acids_total_monounsaturated | g_Streptococcus; s_Unknown <sup>1</sup>    | OTU_33  |
| 97%                                      | 0.048 | 0.003 |     | -0.627 | Fatty_acids_total_monounsaturated | g_Streptococcus; s_Unknown <sup>1</sup>    | OTU_37  |
| 97%                                      | 0.048 | 0.003 |     | -0.63  | Folic_acid                        | g_Streptococcus; s_Unknown <sup>1</sup>    | OTU_37  |
| 91%                                      | 0.048 | 0.002 |     | -0.631 | Total_lipid_fat                   | g_Streptococcus; s_Unknown <sup>1</sup>    | OTU_571 |
| 100%                                     | 0.048 | 0.003 |     | -0.632 | Folic_acid                        | g_Streptococcus; s_Unknown <sup>1</sup>    | OTU_13  |
| 91%                                      | 0.048 | 0.002 |     | -0.633 | Fatty_acids_total_monounsaturated | g_Streptococcus; s_Unknown <sup>1</sup>    | OTU_261 |
| 100%                                     | 0.048 | 0.002 |     | -0.64  | Fatty_acids_total_monounsaturated | g_Streptococcus; s_Unknown <sup>1</sup>    | OTU_13  |
| 99%                                      | 0.048 | 0.002 |     | -0.642 | Fatty_acids_total_monounsaturated | g_Streptococcus; s_Unknown <sup>1</sup>    | OTU_62  |
| 100%                                     | 0.048 | 0.002 |     | -0.642 | Folic_acid                        | g_Streptococcus; s_Unknown <sup>1</sup>    | OTU_23  |

\*Samples from the second-time point - 1 month after delivery  
**1** 99% identity to known sequences in BLASTN database- s\_pneumoniae/oralis/mitis/infantis/ oligofermentans  
**2** 99% identity to known sequences in BLASTN database- s\_haemolysans/taiwanensis/parahaemolysans / sanguinis

**Supplemental Table 3: Interaction-human milk bacteria and FFQ nutrition components\***

| OTUs' repeats out of all the samples (%) | Q      | p     | rho    | FFQ variable                      | Taxonomic name                          | OTUs    |
|------------------------------------------|--------|-------|--------|-----------------------------------|-----------------------------------------|---------|
| 91%                                      |        | 0     | 0      | -0.695 Vitamin_B_12               | g_Streptococcus; s_Unknown <sup>1</sup> | OTU_529 |
| 73%                                      | 0.0922 | 0.014 | -0.525 | Vitamin_B_12                      | g_Rothia; s_mucilaginosa                | OTU_17  |
| 50%                                      | 0.0922 | 0.014 | -0.525 | Folic_acid                        | g_Streptococcus; s_Unknown <sup>1</sup> | OTU_88  |
| 91%                                      | 0.0922 | 0.014 | -0.526 | Total_lipid_fat                   | g_Streptococcus; s_Unknown <sup>1</sup> | OTU_328 |
| 100%                                     | 0.0922 | 0.014 | -0.526 | Fatty_acids_total_saturated       | g_Streptococcus; s_Unknown <sup>1</sup> | OTU_23  |
| 97%                                      | 0.0922 | 0.014 | -0.526 | Fatty_acids_total_saturated       | g_Streptococcus; s_Unknown <sup>1</sup> | OTU_37  |
| 91%                                      | 0.0922 | 0.014 | -0.527 | Folic_acid                        | g_Streptococcus; s_Unknown <sup>1</sup> | OTU_261 |
| 97%                                      | 0.0922 | 0.014 | -0.528 | Total_lipid_fat                   | g_Streptococcus; s_Unknown <sup>1</sup> | OTU_131 |
| 94%                                      | 0.0922 | 0.014 | -0.528 | Total_lipid_fat                   | g_Staphylococcus; s_epidermidis         | OTU_150 |
| 91%                                      | 0.0922 | 0.014 | -0.529 | Carbohydrate_by_difference        | g_Streptococcus; s_Unknown <sup>1</sup> | OTU_529 |
| 99%                                      | 0.0922 | 0.014 | -0.529 | Fatty_acids_total_trans           | g_Streptococcus; s_Unknown <sup>1</sup> | OTU_33  |
| 90%                                      | 0.0922 | 0.014 | -0.529 | Fatty_acids_total_saturated       | g_Streptococcus; s_Unknown <sup>1</sup> | OTU_455 |
| 94%                                      | 0.0922 | 0.014 | -0.53  | Fatty_acids_total_saturated       | g_Staphylococcus; s_epidermidis         | OTU_150 |
| 99%                                      | 0.0922 | 0.013 | -0.53  | Fatty_acids_total_monounsaturated | g_Streptococcus; s_Unknown <sup>1</sup> | OTU_62  |
| 89%                                      | 0.0922 | 0.013 | -0.53  | Fatty_acids_total_monounsaturated | g_Staphylococcus; s_hominis             | OTU_69  |
| 99%                                      | 0.0922 | 0.014 | -0.531 | Fatty_acids_total_saturated       | g_Streptococcus; s_Unknown <sup>1</sup> | OTU_30  |
| 90%                                      | 0.0922 | 0.013 | -0.533 | Fatty_acids_total_trans           | g_Streptococcus; s_Unknown <sup>1</sup> | OTU_455 |
| 100%                                     | 0.0922 | 0.014 | -0.534 | Vitamin_B_12                      | g_Streptococcus; s_Unknown <sup>1</sup> | OTU_13  |
| 97%                                      | 0.0922 | 0.013 | -0.534 | Fatty_acids_total_trans           | g_Streptococcus; s_Unknown <sup>1</sup> | OTU_131 |
| 90%                                      | 0.0922 | 0.013 | -0.534 | Fatty_acids_total_saturated       | g_Streptococcus; s_Unknown <sup>1</sup> | OTU_291 |
| 90%                                      | 0.0922 | 0.012 | -0.535 | Protein                           | g_Streptococcus; s_Unknown <sup>1</sup> | OTU_291 |
| 99%                                      | 0.0922 | 0.013 | -0.535 | Cholesterol                       | g_Streptococcus; s_Unknown <sup>1</sup> | OTU_62  |
| 90%                                      | 0.0922 | 0.013 | -0.535 | Fatty_acids_total_trans           | g_Streptococcus; s_Unknown <sup>1</sup> | OTU_533 |
| 100%                                     | 0.0922 | 0.012 | -0.537 | Fatty_acids_total_trans           | g_Streptococcus; s_Unknown <sup>1</sup> | OTU_23  |
| 90%                                      | 0.0922 | 0.012 | -0.538 | Vitamin_B_12                      | g_Streptococcus; s_Unknown <sup>1</sup> | OTU_498 |
| 90%                                      | 0.0922 | 0.012 | -0.539 | Total_lipid_fat                   | g_Streptococcus; s_Unknown <sup>1</sup> | OTU_455 |
| 91%                                      | 0.0922 | 0.012 | -0.539 | Folic_acid                        | g_Streptococcus; s_Unknown <sup>1</sup> | OTU_529 |
| 99%                                      | 0.0922 | 0.013 | -0.54  | Cholesterol                       | g_Streptococcus; s_Unknown <sup>1</sup> | OTU_15  |
| 100%                                     | 0.0922 | 0.012 | -0.543 | Protein                           | g_Streptococcus; s_Unknown <sup>1</sup> | OTU_1   |
| 97%                                      | 0.0922 | 0.011 | -0.543 | Fatty_acids_total_trans           | g_Streptococcus; s_Unknown <sup>1</sup> | OTU_37  |
| 100%                                     | 0.0922 | 0.012 | -0.544 | Total_lipid_fat                   | g_Streptococcus; s_Unknown <sup>1</sup> | OTU_13  |
| 91%                                      | 0.0922 | 0.011 | -0.544 | Energy                            | g_Streptococcus; s_Unknown <sup>1</sup> | OTU_529 |
| 100%                                     | 0.0922 | 0.012 | -0.544 | Fatty_acids_total_trans           | g_Streptococcus; s_Unknown <sup>1</sup> | OTU_13  |
| 99%                                      | 0.0922 | 0.012 | -0.545 | Total_lipid_fat                   | g_Streptococcus; s_Unknown <sup>1</sup> | OTU_15  |
| 94%                                      | 0.0922 | 0.01  | -0.546 | Protein                           | g_Staphylococcus; s_epidermidis         | OTU_150 |
| 97%                                      | 0.0922 | 0.01  | -0.546 | Cholesterol                       | g_Streptococcus; s_Unknown <sup>1</sup> | OTU_131 |
| 90%                                      | 0.0922 | 0.01  | -0.547 | Fructose                          | g_Streptococcus; s_Unknown <sup>1</sup> | OTU_291 |
| 91%                                      | 0.0922 | 0.01  | -0.548 | Protein                           | g_Streptococcus; s_Unknown <sup>1</sup> | OTU_261 |
| 90%                                      | 0.0922 | 0.01  | -0.548 | Energy                            | g_Streptococcus; s_Unknown <sup>1</sup> | OTU_455 |

\* Samples from the third-time point - 3 months after delivery

1 99% identity to known sequences in BLASTN database- s\_pneumoniae/oralis/mitis/infantis/ oligofermentans
